# Supplementary material for: Computational Study of Crystallography, Defects, Ion Migration and Dopants in Almandine Garnet
Source: MDPI journal article supplement (doi:10.3390/physchem2010004), 2022-03-17
Supplement: s1 [file s1]

Electronic Supplementary Data

# Computational Study of Crystallography, Defects, Ion Migration and Dopants in Almandine Garnet

Janya Lumbini Subasinghe<sup>1</sup>, Sashikesh Ganeshalingam<sup>1</sup> and Navaratnarajah Kuganathan<sup>2,\*</sup>

<sup>1</sup> Department of Chemistry, University of Jaffna, Sir. Pon Ramanathan Road, Thirunelvely, Jaffna, 40000, Srilanka.

<sup>2</sup> Department of Materials, Faculty of Engineering, Imperial College London, London, SW7 2AZ, United Kingdom.

\*Correspondence: n.kuganathan@imperial.ac.uk

**Table S1.** Two body Buckingham potentials used for dopant oxides in Fe<sub>2</sub>Al<sub>2</sub>Si<sub>3</sub>O<sub>12</sub>.

| Interaction                        | <i>A</i> (eV) | $\rho$ (Å) | <i>C</i> (eV·Å <sup>6</sup> ) | <i>Y</i> (e) | <i>K</i> (eV·Å <sup>-2</sup> ) |
|------------------------------------|---------------|------------|-------------------------------|--------------|--------------------------------|
| Ni <sup>2+</sup> - O <sup>2-</sup> | 683.5         | 0.3332     | 0.000                         | 2.000        | 8.77                           |
| Co <sup>2+</sup> - O <sup>2-</sup> | 696.3         | 0.3362     | 0.000                         | 2.000        | 10.74                          |
| Zn <sup>2+</sup> - O <sup>2-</sup> | 499.6         | 0.3595     | 0.000                         | 2.050        | 10.28                          |
| Mn <sup>2+</sup> - O <sup>2-</sup> | 715.80        | 0.3464     | 0.000                         | 3.000        | 81.20                          |
| Mg <sup>2+</sup> - O <sup>2-</sup> | 946.627       | 0.31813    | 0.000                         | 2.000        | 99999                          |
| Ca <sup>2+</sup> - O <sup>2-</sup> | 1090.40       | 0.3372     | 0.000                         | 1.260        | 34.00                          |
| Sr <sup>2+</sup> - O <sup>2-</sup> | 776.84        | 0.35867    | 0.000                         | 1.526        | 11.406                         |
| Ba <sup>2+</sup> - O <sup>2-</sup> | 931.79        | 0.3949     | 0.000                         | 1.460        | 14.78                          |
| Ga <sup>3+</sup> - O <sup>2-</sup> | 2901.12       | 0.2742     | 0.000                         | 1.000        | 99999                          |
| Sc <sup>3+</sup> - O <sup>2-</sup> | 1575.85       | 0.3211     | 0.000                         | 3.000        | 99999                          |
| In <sup>3+</sup> - O <sup>2-</sup> | 1495.65       | 0.3327     | 4.33                          | 3.000        | 99999                          |
| Y <sup>3+</sup> - O <sup>2-</sup>  | 1345.10       | 0.3491     | 0.00                          | 3.000        | 99999                          |
| Gd <sup>3+</sup> - O <sup>2-</sup> | 1885.75       | 0.3399     | 20.34                         | 3.000        | 99999                          |
| La <sup>3+</sup> - O <sup>2-</sup> | 1545.21       | 0.3590     | 0.00                          | -0.250       | 145.0                          |
| Ge <sup>4+</sup> - O <sup>2-</sup> | 1497.3996     | 0.325646   | 16.00                         | 4.000        | 99999                          |
| Sn <sup>4+</sup> - O <sup>2-</sup> | 1414.32       | 0.3479     | 13.66                         | 4.000        | 99999                          |
| Ti <sup>4+</sup> - O <sup>2-</sup> | 877.20        | 0.38096    | 9.00                          | -35.8630     | 65974.00                       |
| Zr <sup>4+</sup> - O <sup>2-</sup> | 1502.11       | 0.3477     | 0.00                          | 1.35         | 169.617                        |
| Ce <sup>4+</sup> - O <sup>2-</sup> | 1986.83       | 0.3511     | 20.40                         | 7.70         | 291.75                         |
